# Supplementary material
Source: PubMed Central journal article supplement (PMC2835233)
Supplement: mt200983x4.pdf [file mt200983x4.pdf]

**Table S1: Treatment Groups**

| <u>Group No.</u> | <u>B-ALL?</u> | <u>Receptor</u> | <u>T cell dose</u>   |
|------------------|---------------|-----------------|----------------------|
| 1                | Yes           | CAR-19 mix      | 20 x 10 <sup>6</sup> |
| 2                | Yes           | CAR-19 mix      | 5 x 10 <sup>6</sup>  |
| 3                | Yes           | CAR-19 mix      | 1 x 10 <sup>6</sup>  |
| 4                | Yes           | Mock            | 20 x 10 <sup>6</sup> |
| 5                | Yes           | Mock            | 5 x 10 <sup>6</sup>  |
| 6                | Yes           | Mock            | 1x 10 <sup>6</sup>   |
| 7                | Yes           | -               | no T cells           |
| 8                | No            | CAR-19 mix      | 20 x 10 <sup>6</sup> |
