# Supplementary material
Source: PubMed Central journal article supplement (PMC2835233)
Supplement: mt200983x5.pdf [file mt200983x5.pdf]

**Supplemental Table S2.** Primer sequences used for construction of the different CARs using the splicing by overlap extension technique.

| <b>Splice Site</b>          | <b>Sequence</b>                                                                                            |
|-----------------------------|------------------------------------------------------------------------------------------------------------|
| hCD8 $\alpha$ hinge – hCD28 | F: AGGGGGCTGGACTTCGCCTGTGATTTTTGGGTGCTGGTGGTGGTTGGT<br>R: ACCAACCACCACCAGCACCCAAAAATCACAGGCGAAGTCCAGCCCCCT |
| hCD28 hinge – h4-1BB        | F: ACTTCGCAGCCTATCGCTCCAAACGGGGCAGAAAGAACT<br>R: AGTTTCTTTCTGCCCCGTTTGGAGCGATAGGCTGCGAAGT                  |
| hCD28 – hTCR- $\zeta$       | F: GCAGCCTATCGCTCCAGAGTGAAGTTCAGCAGGAGCG<br>R: CCTGCTGAACTTCACTCTGGAGCGATAGGCTGCGAA                        |
| 5' CAR                      | F: ATGATCGGATCCATGGCCTTACCAGTGACCGC                                                                        |
| 3' CAR                      | R: TCGACAGTCGACTTAGCGAGGGGGCAGGGCCT                                                                        |
| 3' truncated CAR            | R: TCGACAGTCGACTTACGCGGGGGCGTCTGC                                                                          |
