# Supplementary material
Source: PubMed Central journal article supplement (PMC2835233)
Supplement: mt200983x6.pdf [file mt200983x6.pdf]

**Supplemental Table S3. *In vivo* comparison of  $\alpha$ CD19-BB- $\zeta$  and  $\alpha$ CD19- $\zeta$  persistence in spleens from day 35 to day 198 post injection.**

| Days following T cell injection <sup>1</sup> | T cell Dose (x10 <sup>6</sup> ) | Animal ID | $\alpha$ CD19- $\zeta$ copies/500 ng | $\alpha$ CD19-BB- $\zeta$ copies/500 ng |
|----------------------------------------------|---------------------------------|-----------|--------------------------------------|-----------------------------------------|
| 21                                           | 20                              | 229       | 24.7                                 | 38.7                                    |
| 21                                           | 20                              | 362       | 75.5                                 | 209.4                                   |
| 21                                           | 20                              | 384       | 1948.1                               | 2795.6                                  |
| 22                                           | 20                              | 340       | 25.4                                 | 35.2                                    |
| 22                                           | 20                              | 360       | 161.1                                | 499                                     |
| 21                                           | 5                               | 217       | <2.5                                 | <2.5                                    |
| 21                                           | 5                               | 364       | 6.7                                  | 15.2                                    |
| 22                                           | 5                               | 334       | <2.5                                 | <2.5                                    |
| 22                                           | 5                               | 361       | <2.5                                 | <2.5                                    |
| 21                                           | 1                               | 219       | <2.5                                 | <2.5                                    |
| 21                                           | 1                               | 225       | <2.5                                 | 6.1                                     |
| 22                                           | 1                               | 339       | <2.5                                 | <2.5                                    |
| 22                                           | 1                               | 366       | <2.5                                 | <2.5                                    |
| 33                                           | 20                              | 385       | Dead before analysis                 |                                         |
| 35                                           | 20                              | 221       | 50.2                                 | 41.2                                    |
| 35                                           | 20                              | 236       | 49.9                                 | 64.5                                    |
| 35                                           | 20                              | 359       | 326.9                                | 760.7                                   |
| 36                                           | 20                              | 337       | 20.9                                 | 13.5                                    |
| 35                                           | 5                               | 224       | <2.5                                 | <2.5                                    |
| 35                                           | 5                               | 313       | <2.5                                 | <2.5                                    |
| 35                                           | 5                               | 350       | <2.5                                 | 3                                       |
| 36                                           | 5                               | 238       | <2.5                                 | <2.5                                    |

| <b>Days following T cell injection<sup>1</sup></b> | <b>T cell Dose (x10<sup>6</sup>)</b> | <b>Animal ID</b> | <b>αCD19-ζ copies/500 ng</b> | <b>αCD19-BB-ζ copies/500 ng</b> |
|----------------------------------------------------|--------------------------------------|------------------|------------------------------|---------------------------------|
| 35                                                 | 1                                    | 235              | <2.5                         | 6.4                             |
| 35                                                 | 1                                    | 352              | 3.1                          | 7.1                             |
| 36                                                 | 1                                    | 237              | <2.5                         | <2.5                            |
| 36                                                 | 1                                    | 338              | <2.5                         | <2.5                            |
| 44                                                 | 20                                   | 193              | 979.9                        | 2408.9                          |
| 44                                                 | 20                                   | 324              | 927.5                        | 14167.9                         |
| 44                                                 | 20                                   | 343              | 4008.2                       | 9957.9                          |
| 44                                                 | 20                                   | 382              | 5325                         | 11049.8                         |
| 44                                                 | 20                                   | 383              | 1441                         | 3818.1                          |
| 57                                                 | 20                                   | 356              | 1356.5                       | 240.7                           |
| 115                                                | 1                                    | 341              | Dead before analysis         |                                 |
| 125                                                | 20                                   | 393              | 27.2                         | 61.8                            |
| 134                                                | 5                                    | 6497             | 9.8                          | <2.5                            |
| 135                                                | 5                                    | 373              | <2.5                         | <2.5                            |
| 134                                                | 1                                    | 242              | <2.5                         | <2.5                            |
| 134                                                | 1                                    | 323              | <2.5                         | <2.5                            |
| 134                                                | 1                                    | 330              | <2.5                         | <2.5                            |
| 134                                                | 1                                    | 377              | <2.5                         | <2.5                            |
| 135                                                | 1                                    | 354              | 3.4                          | 13                              |
| 134                                                | 1                                    | 6469             | <2.5                         | 7.3                             |
| 169                                                | 1                                    | 192              | Dead before analysis         |                                 |
| 182                                                | 5                                    | 344              | 14.2                         | <2.5                            |
| 196                                                | 20                                   | 244              | <2.5                         | <2.5                            |
| 196                                                | 20                                   | 374              | PCR failed                   |                                 |
| 196                                                | 20                                   | 372              | <2.5                         | <2.5                            |
| 196                                                | 5                                    | 321              | <2.5                         | 5.6                             |

| <b>Days following T cell injection<sup>1</sup></b> | <b>T cell Dose (x10<sup>6</sup>)</b> | <b>Animal ID</b> | <b>αCD19-ζ copies/500 ng</b> | <b>αCD19-BB-ζ copies/500 ng</b> |
|----------------------------------------------------|--------------------------------------|------------------|------------------------------|---------------------------------|
| 196                                                | 5                                    | 328              | <2.5                         | <2.5                            |
| 198                                                | 5                                    | 208              | <2.5                         | <2.5                            |
| 198                                                | 5                                    | 245              | 156.5                        | 1624.9                          |

<sup>1</sup>Animals were given CAR+ T cell injections consisting of a 50:50 mixture of αCD19-TCR-ζ and αCD19-TCR-ζ;4-1BB T cells that were dosed at 1x10<sup>6</sup>, 5x10<sup>6</sup>, or 20x10<sup>6</sup> T cells per mouse; the mice in the low dose group had progressive leukemia, while the animals in the medium and high dose treatment groups controlled tumor (not shown). See Supplementary Methods for description of experimental design.
